# Supplementary material for: Physiological responses of wild birds to artificial grass during introduction to laboratory housing
Source: PeerJ journal article supplement (doi:10.7717/peerj.19095), 2025-03-24
Supplement: Data.zip [file Data.zip]

## Sheet: finalday_allcort
BirdID	sample	group	cort	time_min	day
F164	base	grass_standard	16.23	0	42
F164	stress	grass_standard	33.87	30	42
F164	dex	grass_standard	4.933	90	42
F427	base	standard_grass	14.1	0	42
F427	stress	standard_grass	43.27	30	42
F427	dex	standard_grass	7.629	90	42
F518	base	grass_standard		0	42
F518	stress	grass_standard	45.08	30	42
F518	dex	grass_standard	14.42	90	42
F545	base	standard_grass		0	42
F545	stress	standard_grass	68.58	30	42
F545	dex	standard_grass	3.414	90	42
F551	base	grass_standard	23.37	0	42
F551	stress	grass_standard	60.12	30	42
F551	dex	grass_standard	7.408	90	42
M109	base	standard_grass	16.01	0	42
M109	stress	standard_grass	64.45	30	42
M109	dex	standard_grass	6.763	90	42
M317	base	grass_standard	9.142	0	42
M317	stress	grass_standard	42.95	30	42
M317	dex	grass_standard	5.111	90	42
M458	base	grass_standard	31.07	0	42
M458	stress	grass_standard	109.5	30	42
M458	dex	grass_standard	21.27	90	42
M461	base	grass_standard	10.93	0	42
M461	stress	grass_standard	13.36	30	42
M461	dex	grass_standard	12.7651	90	42
M484	stress	standard_grass	29.52	30	42
M484	dex	standard_grass	3.705	90	42
M489	base	grass_standard	15.83	0	42
M489	stress	grass_standard	41.36	30	42
M489	dex	grass_standard	15.06	90	42
M509	base	standard_grass	13.81	0	42
M509	stress	standard_grass	30.18	30	42
M509	dex	standard_grass	8.991	90	42
M523	base	grass_standard	6.072	0	42
M523	stress	grass_standard	56.27	30	42
M523	dex	grass_standard	13.1	90	42
M524	base	standard_grass	42.18	0	42
M524	stress	standard_grass	25.96	30	42
M524	dex	standard_grass	21.39	90	42
M534	base	standard_grass	16.26	0	42
M534	stress	standard_grass	33.73	30	42
M534	dex	standard_grass	14.06	90	42
M546	base	standard_grass	25.27	0	42
M546	stress	standard_grass	15.78	30	42
M546	dex	standard_grass	13.86	90	42
M564	stress	standard_grass	24.5241	30	42
M564	dex	standard_grass	6.091	90	42
M567	base	grass_standard	9.479	0	42
M567	stress	grass_standard	31.75	30	42
M567	dex	grass_standard	6.292	90	42
M597	base	standard_grass	9.701	0	42
M597	stress	standard_grass	84.14	30	42
M597	dex	standard_grass	19.48	90	42
M599	base	grass_standard	7.417	0	42
M599	stress	grass_standard	44.81	30	42
M599	dex	grass_standard	9.249	90	42

## Sheet: switchday_allcort
BirdID	sample	group	cort	time_min	day
F164	base	grass_standard	5.7215	0	21
F164	stress	grass_standard	29.68	30	21
F164	dex	grass_standard	14.61	90	21
F427	base	standard_grass	12.775	0	21
F427	stress	standard_grass	24.6	30	21
F427	dex	standard_grass	9.9	90	21
F518	base	grass_standard	16.06	0	21
F518	stress	grass_standard	55.235	30	21
F518	dex	grass_standard	7.043	90	21
F545	base	standard_grass		0	21
F545	stress	standard_grass	24.848	30	21
F545	dex	standard_grass	15.85	90	21
F551	base	grass_standard	13.575	0	21
F551	stress	grass_standard	30.605	30	21
F551	dex	grass_standard	7.5975	90	21
M109	base	standard_grass	11.49	0	21
M109	stress	standard_grass	42.643	30	21
M109	dex	standard_grass	34.97	90	21
M317	base	grass_standard	7.248	0	21
M317	stress	grass_standard	18.11	30	21
M317	dex	grass_standard	16.875	90	21
M458	base	grass_standard	5.6965	0	21
M458	stress	grass_standard	27.148	30	21
M458	dex	grass_standard	20.482	90	21
M461	stress	grass_standard	19.575	30	21
M461	dex	grass_standard	18.58	90	21
M484	base	standard_grass		0	21
M484	stress	standard_grass	40.56	30	21
M484	dex	standard_grass	26.185	90	21
M489	base	grass_standard	9.645	0	21
M489	stress	grass_standard	21.17	30	21
M489	dex	grass_standard	8.3045	90	21
M509	stress	standard_grass	55.075	30	21
M509	dex	standard_grass	10.938	90	21
M523	base	grass_standard	13.92	0	21
M523	stress	grass_standard	34.56	30	21
M523	dex	grass_standard	11.38	90	21
M524	base	standard_grass	24.31	0	21
M524	stress	standard_grass	37.982	30	21
M524	dex	standard_grass	23.22	90	21
M534	base	standard_grass		0	21
M534	stress	standard_grass	66.735	30	21
M534	dex	standard_grass	35.4	90	21
M546	base	standard_grass	10.61	0	21
M546	stress	standard_grass	34.06	30	21
M546	dex	standard_grass	12.243	90	21
M564	base	standard_grass	16.98	0	21
M564	stress	standard_grass	61.725	30	21
M564	dex	standard_grass	8.3045	90	21
M567	base	grass_standard	7.0115	0	21
M567	stress	grass_standard	46.56	30	21
M567	dex	grass_standard	11.0125	90	21
M597	base	standard_grass	17.72	0	21
M597	stress	standard_grass	44.028	30	21
M597	dex	standard_grass	29.46	90	21
M599	base	grass_standard	3.7325	0	21
M599	stress	grass_standard	16.195	30	21
M599	dex	grass_standard	13.47	90	21
